# Supplementary material for: A rapid method for detection of genetically modified organisms based on magnetic separation and surface-enhanced Raman scattering
Source: Royal Society of Chemistry journal article supplement (doi:10.1039/c1an15629b), 2011-11-03
Supplement: c1an15629b.pdf [file c1an15629b.pdf]

## Supporting Information

### **A Rapid Method for Detection of Genetically Modified Organisms Based on Magnetic Separation and Surface-Enhanced Raman Scattering**

**Burcu Guven<sup>1</sup>, İsmail Hakkı Boyacı<sup>1\*</sup>, Ugur Tamer<sup>2</sup> and Pınar Çalık<sup>3</sup>**

<sup>1</sup> **Department of Food Engineering, Faculty of Engineering, Hacettepe University, Beytepe 06800Ankara, Turkey**

<sup>2</sup> **Department of Analytical Chemistry, Faculty of Pharmacy, Gazi University, 06330 Ankara, Turkey**

<sup>3</sup> **Department of Chemical Engineering, Industrial Biotechnology and Metabolic Engineering Laboratory, Middle East Technical University, 06531 Ankara, Turkey**

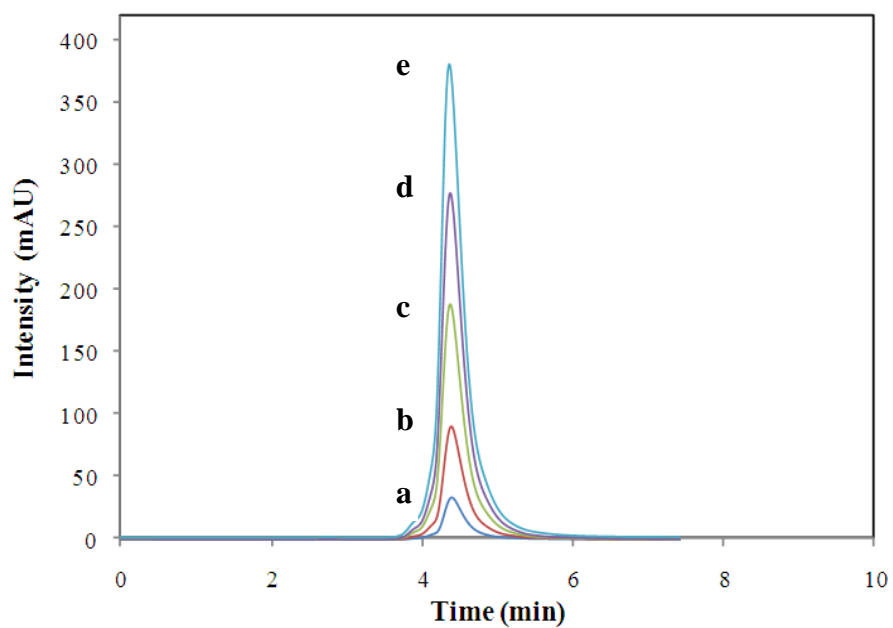

Fig. S1. Probe intensities (a) 1 μM, (b) 2.5 μM, (c) 5 μM, (d) 7.5 μM, (e) 10 μM

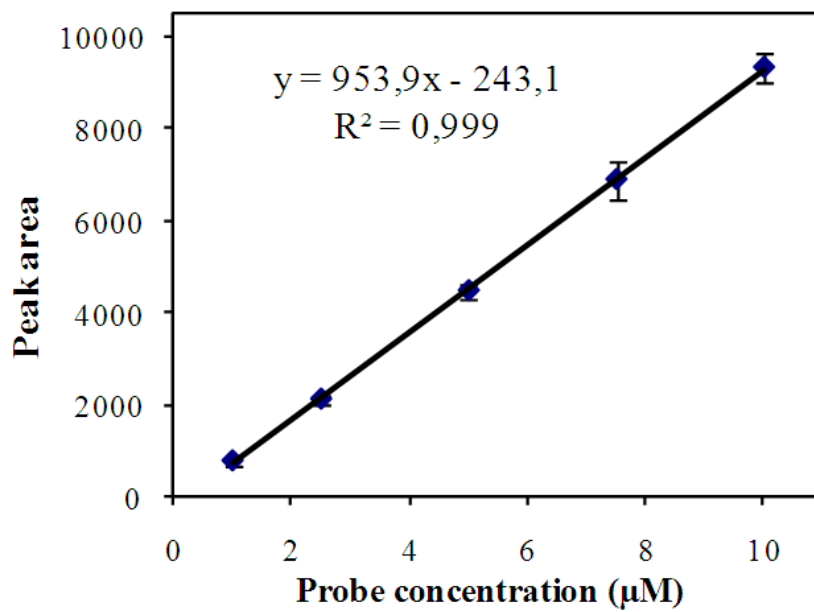

Fig. S2. Calibration curve for probe oligonucleotide in range of 1-10 µM

Fig. S3.

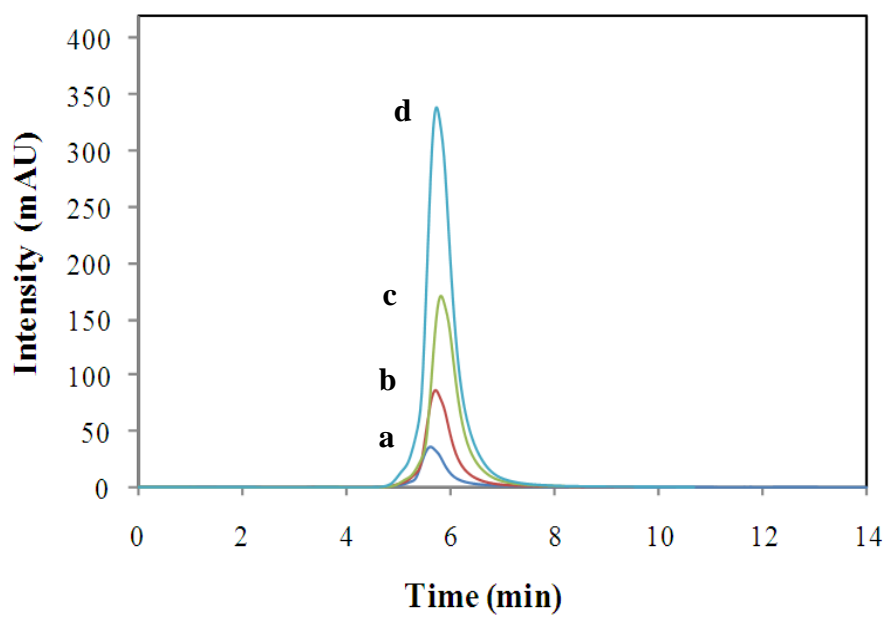

Target intensities (a) 1  $\mu\text{M}$ , (b) 2.5  $\mu\text{M}$ , (c) 5  $\mu\text{M}$ , (d) 10  $\mu\text{M}$

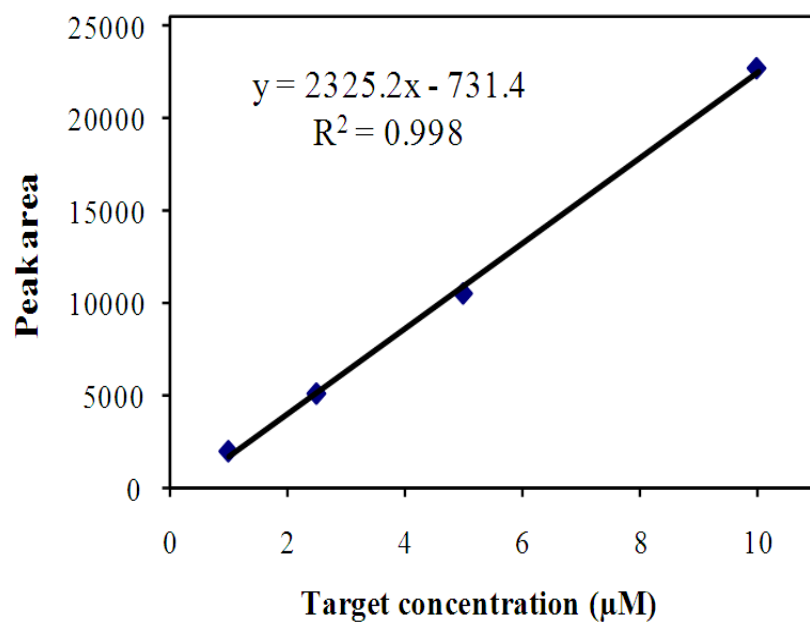

Fig. S4. Calibration curve for target oligonucleotide in range of 1-10 µM

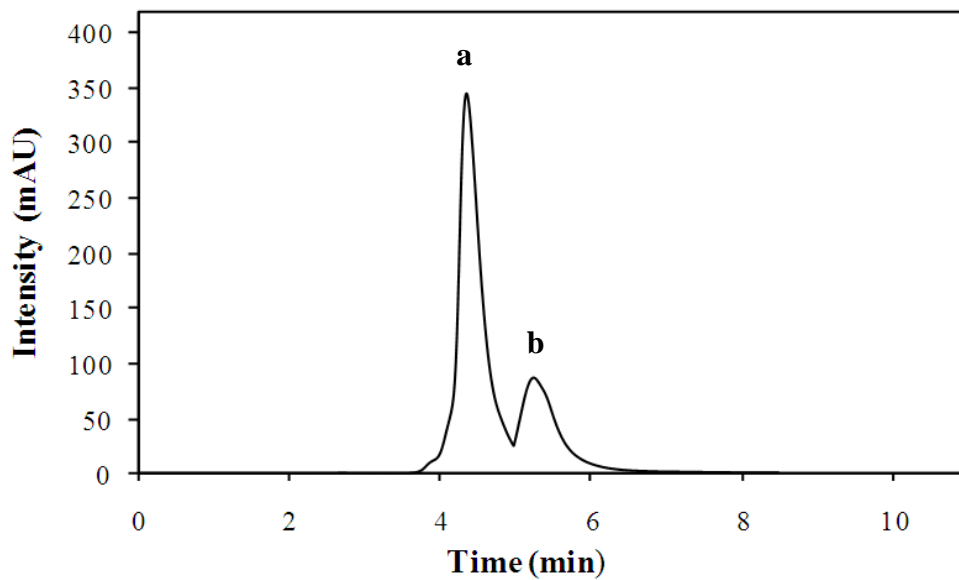

Fig. S5. Probe and target chromatogram (a) probe, (b) target oligonucleotide
